# Supplementary material
Source: PubMed Central journal article supplement (PMC4386575)
Supplement: NIHMS576001-supplement-Supplemental_Material.pdf [file NIHMS576001-supplement-Supplemental_Material.pdf]

## SUPPLEMENTAL METHODS

### ***Post Hoc Analyses***

In our initial analyses, we chose to use Kruskal-Wallis tests to compare our hospital-level outcomes across quartiles of hospitals. This technique allowed us to identify any differences in our outcomes across all 4 quartiles, but it did not allow us to determine which quartiles (if any) differed from one other. Thus, we decided to perform pairwise comparisons using Kruskal-Wallis tests. This technique allowed us to compare each quartile to each other quartile. However, since we did not initially plan these pairwise analyses, we refer to this analysis as *post hoc*. Furthermore, in order to minimize the likelihood of type I error, we used the Bonferroni correction in our *post hoc* analysis.
